# Supplementary material
Source: bioRxiv or medRxiv preprint supplement (https://medrxiv.org/content/medrxiv/early/2021/09/07/2021.09.02.21262599/DC2/embed/media-2.pdf)
Supplement: Supplementary file [file media-2.pdf]

**Supplemental Table 2 - Blood biochemistry at admission and at follow up; clinical severity comparison**

| Biochemical Parameter                     |           | Mild (N = 38, 23%) | Moderate (N = 29, 17%) | Severe (N = 101, 60%) | Effect Size ( $\eta^2$ ) | P-value           |
|-------------------------------------------|-----------|--------------------|------------------------|-----------------------|--------------------------|-------------------|
| WBC count ( $\times 10^3 / \mu\text{L}$ ) | Admission | 5.6 (4.5-8.1)      | 7.1 (4.9-8.5)          | 7.8 (6.0-11.6)        | 0.090                    | <b>0.0002</b>     |
|                                           | Follow-up | 6.4 (5.4-7.5)      | 7.1 (4.9-8.4)          | 7.2 (6.2-8.8)         | 0.040                    | <b>0.0072</b>     |
| CRP (mg/l)                                | Admission | 34.4 (16.9-88.1)   | 79.5 (18.3-128.1)      | 99.2 (51.6-147.2)     | 0.088                    | <b>0.0001</b>     |
|                                           | Follow-up | 2.6 (0.7-8.6)      | 4.1 (0.9-16.6)         | 5.7 (2.5-18.9)        | 0.038                    | <b>0.0398</b>     |
| LDH (U/l)                                 | Admission | 250 (226-321)      | 362 (285-434)          | 427 (335-603)         | <b>0.252</b>             | <b>&lt;0.0001</b> |
|                                           | Follow-up | 185 (167-236)      | 251 (182-267)          | 243 (206-346)         | 0.132                    | <b>0.0074</b>     |
| RBC count ( $\times 10^5 / \mu\text{L}$ ) | Admission | 4.7 $\pm$ 0.7      | 4.7 $\pm$ 0.6          | 4.6 $\pm$ 0.6         | 0.004                    | 0.5298            |
|                                           | Follow-up | 4.7 $\pm$ 0.7      | 4.7 $\pm$ 0.7          | 4.5 $\pm$ 0.6         | 0.011                    | 0.1636            |
| Neutrophils %                             | Admission | 73.0 $\pm$ 11.4    | 77.3 $\pm$ 10.9        | 83.2 $\pm$ 9.0        | <b>0.155</b>             | <b>&lt;0.0001</b> |
|                                           | Follow-up | 59.5 $\pm$ 10.5    | 57.0 $\pm$ 10.0        | 60.1 $\pm$ 12.3       | 0.003                    | 0.2897            |
| Lymphocytes %                             | Admission | 14.5 (11.3-24.8)   | 15.0 (11.2-18.3)       | 9.5 (6.2-14.7)        | <b>0.125</b>             | <b>&lt;0.0001</b> |
|                                           | Follow-up | 30.3 (22.2-36.6)   | 31.2 (27.1-39.5)       | 29.6 (22.3-38.9)      | 0.002                    | 0.3183            |
| NLR                                       | Admission | 5.5 (2.5-8.1)      | 5.8 (5.1-10.3)         | 9.3 (5.7-16.6)        | 0.124                    | <b>&lt;0.0001</b> |
|                                           | Follow-up | 1.9 (1.4-2.9)      | 1.9 (1.3-2.3)          | 2.2 (1.3-3.2)         | 0.002                    | 0.3179            |
| PLT ( $\times 10^3 / \mu\text{L}$ )       | Admission | 182 (156-266)      | 163 (136-256)          | 215 (184-303)         | 0.037                    | <b>0.0171</b>     |
|                                           | Follow-up | 247 (201-278)      | 236 (192-285)          | 247 (209-292)         | 0.005                    | 0.5669            |
| Monocytes %                               | Admission | 7.7 (5.4-11.2)     | 5.6 (3.9-6.8)          | 4.5 (3.4-6.5)         | <b>0.144</b>             | <b>&lt;0.0001</b> |
|                                           | Follow-up | 8.4 (7.2-10.3)     | 8.2 (7.0-9.5)          | 8.0 (6.4-9.5)         | 0.001                    | 0.3443            |
| ALT (U/l)                                 | Admission | 42 (29-74)         | 48 (37-68)             | 60 (44-85)            | 0.034                    | <b>0.0224</b>     |
|                                           | Follow-up | 36 (27-49)         | 34 (27-43)             | 39 (29-47)            | 0.003                    | 0.4586            |
| AST (U/l)                                 | Admission | 33 (26-63)         | 48 (34-62)             | 51 (38-67)            | 0.053                    | <b>0.0044</b>     |
|                                           | Follow-up | 23 (20-28)         | 23 (17-27)             | 23 (19-27)            | 0.01                     | 0.7346            |
| Basophils, %                              | Admission | 0.20 (0.15-0.24)   | 0.17 (0.11-0.28)       | 0.14 (0.10-0.20)      | 0.021                    | 0.0643            |
|                                           | Follow-up | 0.40 (0.26-0.56)   | 0.40 (0.30-0.50)       | 0.35 (0.28-0.47)      | 0.002                    | 0.4376            |
| Eosinophil, %                             | Admission | 0.20 (0.00-0.38)   | 0.07 (0.00-0.21)       | 0.10 (0.04-0.22)      | 0.006                    | 0.2178            |
|                                           | Follow-up | 1.8 (1.1-2.9)      | 1.6 (1.0-2.4)          | 1.8 (0.9-2.8)         | 0.009                    | 0.7639            |
| Haemoglobin (g/dl)                        | Admission | 14.1 (12.5-14.6)   | 13.3 (12.2-14.7)       | 13.4 (12.3-14.4)      | 0.005                    | 0.5415            |
|                                           | Follow-up | 13.8 (12.5-14.7)   | 13.8 (11.7-14.4)       | 13.2 (11.8-14.3)      | 0.007                    | 0.2073            |
| D-dimer (ng/mL)                           | Admission | 830 (380-1253)     | 780 (590-1720)         | 1180 (625-2265)       | 0.034                    | <b>0.0228</b>     |
|                                           | Follow-up | 315 (190.0-455)    | 450 (280-1220)         | 600 (283-1168)        | 0.072                    | <b>0.0124</b>     |
| Haematocrit                               | Admission | 40.3 (36.6-42.7)   | 39.5 (36.1-42.4)       | 39.0 (35.8-41.8)      | 0.003                    | 0.4532            |
|                                           | Follow-up | 39.7 (36.5-42.8)   | 40.4 (36.3-42.6)       | 38.6 (35.0-41.8)      | 0.001                    | 0.3280            |
| Fibrinogen (g/l)                          | Admission | 4.0 (3.5-5.9)      | 4.7 (3.0-6.3)          | 5.4 (3.8-8.0)         | 0.031                    | 0.0316            |
|                                           | Follow-up | 2.9 (2.7-3.6)      | 2.8 (2.3-3.2)          | 3.1 (2.7-4.3)         | 0.015                    | 0.2437            |
| Ferritin (ng/ml)                          | Admission | 515 (281-780)      | 641 (257-1635)         | 1262 (588-1650)       | 0.111                    | <b>&lt;0.0001</b> |
|                                           | Follow-up | 226 (78-393)       | 257 (97-425)           | 432 (170-916)         | 0.095                    | 0.0631            |

**Supplemental Table 2 - Blood biochemistry at admission and at follow up; clinical severity comparison (*continued*)**

| Biochemical Parameter     |           | Mild<br>(N = 38, 23%) | Moderate<br>(N = 29, 17%) | Severe<br>(N = 101, 60%) | Effect Size ( $\eta^2$ ) | P-value           |
|---------------------------|-----------|-----------------------|---------------------------|--------------------------|--------------------------|-------------------|
| IL-6 (pg/ml)              | Admission | 10.0 (4.2-21.2)       | 17.4 (5.3-36.8)           | 27.1 (9.3-56.5)          | 0.066                    | <b>0.0038</b>     |
|                           | Follow-up | 2.0 (0.7-8.7)         | 3.7 (0.5-216.6)           | 5.1 (1.7-28.9)           | 0.037                    | 0.6450            |
| SII                       | Admission | 954 (402-2218)        | 982 (664-1883)            | 2214 (1178-4324)         | 0.12                     | <b>&lt;0.0001</b> |
|                           | Follow-up | 453 (313-693)         | 428 (254-622)             | 512 (308-855)            | 0.002                    | 0.4458            |
| Urea (mmol/L)             | Admission | 4.9 (3.9-7.0)         | 6.3 (5.0-8.2)             | 5.7 (4.1-7.5)            | 0.08                     | <b>0.0005</b>     |
|                           | Follow-up | 4.9 (3.6-6.3)         | 4.3 (3.6-5.3)             | 4.8 (3.6-5.7)            | 0.008                    | 0.6732            |
| Creatinine ( $\mu$ mol/L) | Admission | 81.1 (69.1-92.2)      | 77.9 (60.6-91.3)          | 80.0 (67.6-98.3)         | 0.003                    | 0.4558            |
|                           | Follow-up | 77.4 (65.7-87.2)      | 67.3 (55.6-84.2)          | 67.0 (55.0-81.5)         | 0.016                    | 0.0982            |

Effect size across clinical severity groups is calculated as eta squared ( $\eta^2$ ), where  $0.01 \leq 0.06$  (small effect),  $0.06 \leq 0.14$  (moderate effect) and  $> 0.14$  (large effect).

CRP, C-reactive protein; IL6, interleukin-6; ALT, alanine aminotransferase; AST, aspartate aminotransferase, LDH, lactate dehydrogenase, WBC, white blood cell count; RBC, red blood cell count; SII, systemic immune-inflammation index; NLR, neutrophil-to-lymphocyte ratio.
